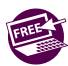

## COMMENT

## Is Incretin-Based Therapy Ready for the Care of Hospitalized Patients With Type 2 Diabetes?

*Diabetes Care* 2014;37:e40–e41 | DOI: 10.2337/dc13-1616

Adam M. Deane<sup>1,2</sup> and  
Michael Horowitz<sup>3</sup>

We read with interest the narratives by Schwartz and DeFronzo (1) and Umpierrez and Korytkowski (2) relating to the use of incretin-based therapy in the care of hospitalized patients with hyperglycemia. We have performed a number of mechanistic studies to evaluate incretin-based therapies in the critically ill that were not referenced (3–5). In these articles, exogenous glucagon-like peptide 1 (GLP-1) was shown to attenuate the glycemic response to enteral nutrient in mechanically ventilated critically ill patients both with and without preexisting type 2 diabetes, and was associated with stimulation of serum insulin and suppression of plasma glucagon (3,5). Enteral nutrition can be administered directly into the stomach or small intestine, and the route of feeding is a major determinant of glucose-lowering that occurs with GLP-1. We observed that GLP-1 slows gastric emptying when the emptying rate is relatively “normal,” but not when emptying is already abnormally slow, which is often the case in the critically ill (4).

It is recognized that the use of insulin has substantial limitations, particularly as excess dosing precipitates hypoglycemia and, despite sophisticated algorithms, glycemic variability remains a major problem (1,6). GLP-1 also has potential

advantages over insulin, including putative beneficial cardiac effects, and its use has the capacity to reduce nursing workloads (1,2). Neither narrative, however, discussed the concept that hyperglycemia is not the same insult in every patient, rather, that patients with critical illness–induced hyperglycemia should potentially be treated differently to those patients with preexisting hyperglycemia associated with diabetes, which is exacerbated by critical illness (6). Rapid glucose lowering with or without overt hypoglycemia may indeed be harmful in the latter group, and the capacity of GLP-1 to lower glycemia more gradually may lead to improved outcomes (6). Another potential advantage is that there is no impediment to intravenous administration of an agent in the critically ill. Nauck et al. (7) have recently summarized the evidence that intravenous administration of GLP-1 or its agonists may be more effective, with less adverse events, than subcutaneous administration. While the “normalization” of glycemia did not occur in all critically ill patients we studied, we have not observed hypoglycemia or vomiting following intravenous administration of GLP-1 in this group (3–5).

While we agree with Schwartz and DeFronzo (1) that the use of incretin-based therapies in hospitalized patients

is appealing, our experience would support the view of Umpierrez and Korytkowski (2) that insulin is a proven therapy, albeit one with major limitations, and should currently remain the treatment of choice. We suggest that additional data relating to 1) optimizing incretin-based regimens, such as whether the intact peptide, agonists, dipeptidyl peptidase-4 inhibitors, and/or glucose-dependent insulinotropic polypeptide should be used; 2) whether GLP-1 and its agonists are effective as monotherapy (which we would favor) and, if so, which patients respond or which are more appropriately treated using GLP-1 and its agonists in combination with insulin; and 3) cardiovascular safety should be sought promptly, as this information is important prior to widespread use of incretin-based regimens in hospitalized patients.

**Duality of Interest.** No potential conflicts of interest relevant to this article were reported.

### References

- Schwartz S, DeFronzo RA. Is incretin-based therapy ready for the care of hospitalized patients with type 2 diabetes? The time has come for GLP-1 receptor agonists! *Diabetes Care* 2013;36:2107–2111
- Umpierrez GE, Korytkowski M. Is incretin-based therapy ready for the care of

<sup>1</sup>Discipline of Acute Care Medicine, University of Adelaide, North Terrace, Adelaide, South Australia, Australia

<sup>2</sup>Intensive Care Unit, Level 4, Emergency Services Building, Royal Adelaide Hospital, North Terrace, Adelaide, South Australia, Australia

<sup>3</sup>Discipline of Medicine, University of Adelaide, Royal Adelaide Hospital, North Terrace, Adelaide, South Australia, Australia

Corresponding author: Adam M. Deane, adam.deane@adelaide.edu.au.

© 2014 by the American Diabetes Association. See <http://creativecommons.org/licenses/by-nc-nd/3.0/> for details.

- hospitalized patients with type 2 diabetes? Insulin therapy has proven itself and is considered the mainstay of treatment. *Diabetes Care* 2013;36:2112–2117
3. Deane AM, Chapman MJ, Fraser RJ, Burgstad CM, Besanko LK, Horowitz M. The effect of exogenous glucagon-like peptide-1 on the glycaemic response to small intestinal nutrient in the critically ill: a randomised double-blind placebo-controlled cross over study. *Crit Care* 2009;13:R67
  4. Deane AM, Chapman MJ, Fraser RJ, et al. Effects of exogenous glucagon-like peptide-1 on gastric emptying and glucose absorption in the critically ill: relationship to glycemia. *Crit Care Med* 2010;38:1261–1269
  5. Deane AM, Summers MJ, Zaknic AV, et al. Exogenous glucagon-like peptide-1 attenuates the glycaemic response to postpyloric nutrient infusion in critically ill patients with type-2 diabetes. *Crit Care* 2011;15:R35
  6. Deane AM, Horowitz M. Dysglycaemia in the critically ill—significance and management. *Diabetes Obes Metab* 2013; 15:792–801
  7. Nauck MA, Baranov O, Ritzel RA, Meier JJ. Do current incretin mimetics exploit the full therapeutic potential inherent in GLP-1 receptor stimulation? *Diabetologia* 2013;56: 1878–1883
